# Supplementary material for: Miltefosine impacts small molecule transport in Gram-positive bacteria
Source: Royal Society of Chemistry journal article supplement (doi:10.1039/d4cb00106k), 2024-01-01
Supplement: d4cb00106k1.pdf [file d4cb00106k1.pdf]

# Supplementary Information: Miltefosine Impacts Small Molecule Transport in Gram-Positive Bacteria

Marea J. Blake, Eleanor F. Page, Madeline E. Smith and Tessa R. Calhoun\*

*Department of Chemistry, University of Tennessee, Knoxville, TN 37966,  
United States*

\*trcalhoun@utk.edu

## **Table of Contents:**

- Fig. S1 Time-resolved SHS trials of 25  $\mu\text{M}$  MG with *S. aureus* after different incubation times.
- Fig. S2 Time-resolved SHS trials of 16  $\mu\text{M}$  FM 2-10 with *S. aureus* with increasing concentrations of MLT.

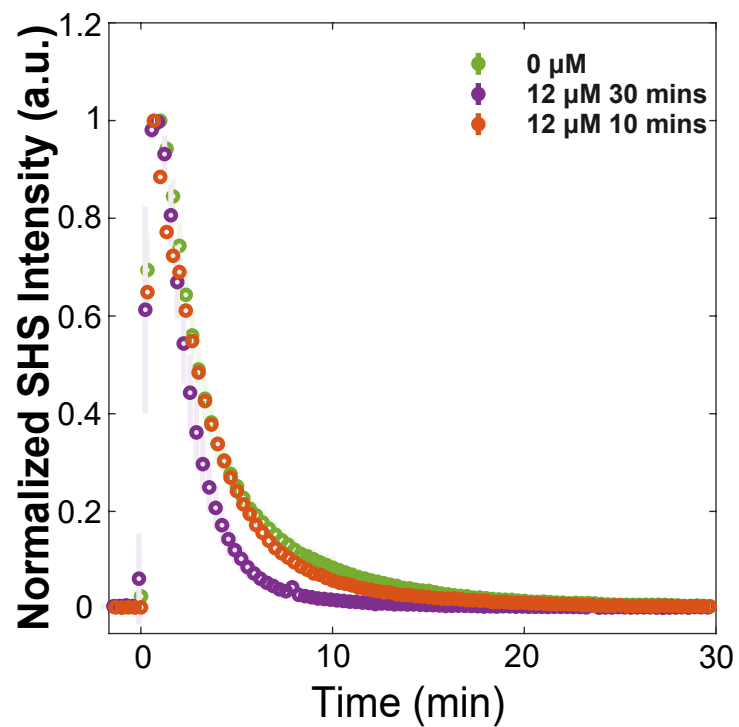

Figure S1: Normalized trSHS trials of *S. aureus* with 25  $\mu\text{M}$  MG with 0  $\mu\text{M}$  MLT (green) and 12  $\mu\text{M}$  MLT incubated for 10 min (orange) and 30 min. (purple). Averaged data is shown as circles and the shaded error bars represent the standard deviation between the individual normalized trials.

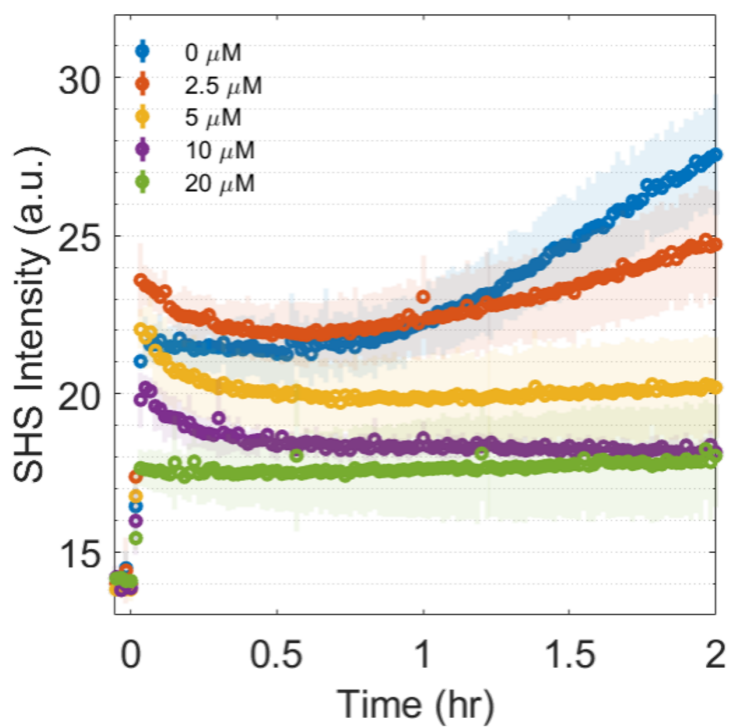

Figure S2: TrSHS trials of 16  $\mu\text{M}$  FM 2-10 with *S. aureus* with increasing concentrations of MLT. For each concentration of MLT,  $n = 3$ . Averaged data is shown as circles and the shaded error bars represent the standard deviation between the individual trials.
